# Supplementary material for: The Role of Location of Tumor in the Prognosis of the Pancreatic Cancer
Source: MDPI journal article supplement (doi:10.3390/cancers12082036), 2020-07-24
Supplement: s1 [file s1]

Supplementary Materials:

# The Role of Location of Tumor in the Prognosis of the Pancreatic Cancer

Mirang Lee, Woil Kwon, Hongbeom Kim, Yoonhyeong Byun, Youngmin Han, Jae Seung Kang, Yoo Jin Choi and Jin-Young Jang

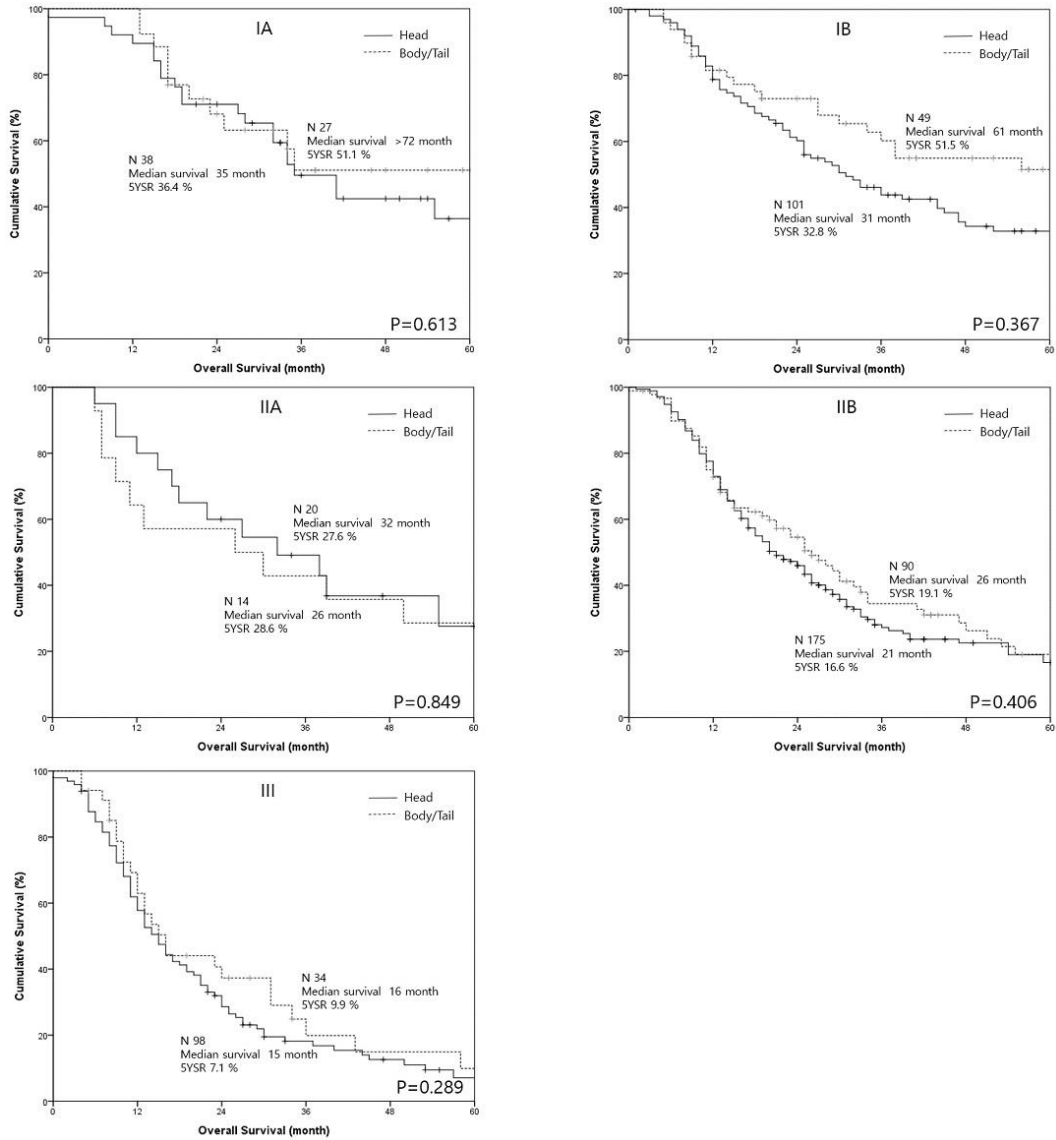

**Figure S1.** The survival curves of pancreas head/uncinate cancer and pancreas body cancer according to prognostic group according to the eighth edition of AJCC cancer staging system.
